# Supplementary material for: Microwave synthesis of carbon dots with multi-response using denatured proteins as carbon source
Source: Royal Society of Chemistry journal article supplement (doi:10.1039/c5ra23081k), 2016-01-01
Supplement: c5ra23081k1.pdf [file c5ra23081k1.pdf]

## Microwave synthesis of carbon dots with multi-response using denatured proteins as carbon source

Xue Liu, Tianze Li, Yu Hou, Qihua Wu, Jie Yi and Guolin Zhang\*

Liaoning Province Key Laboratory for Green Synthesis and Preparative Chemistry of Advanced Materials, College of Chemistry, Liaoning University, Shenyang, 110036, (P. R. China), Fax: (+86) 24-6220-2380, E-mail: [gizhang@lnu.edu.cn](mailto:gizhang@lnu.edu.cn)

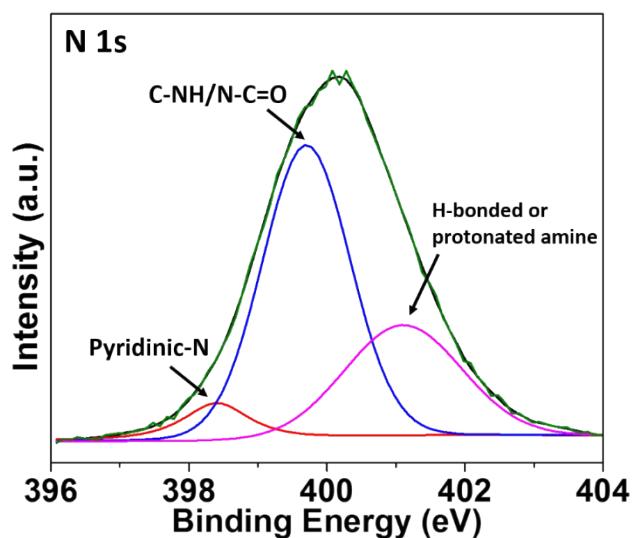

Fig. S1 High-resolution N 1s XPS spectra of CDs.

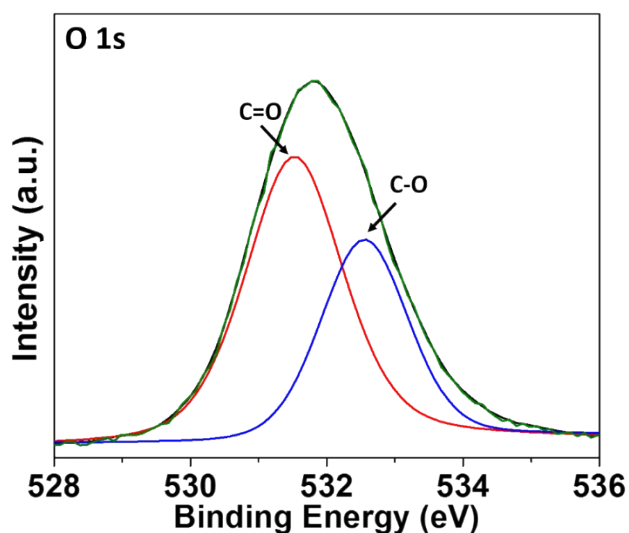

Fig. S2 High-resolution O 1s XPS spectra of CDs.

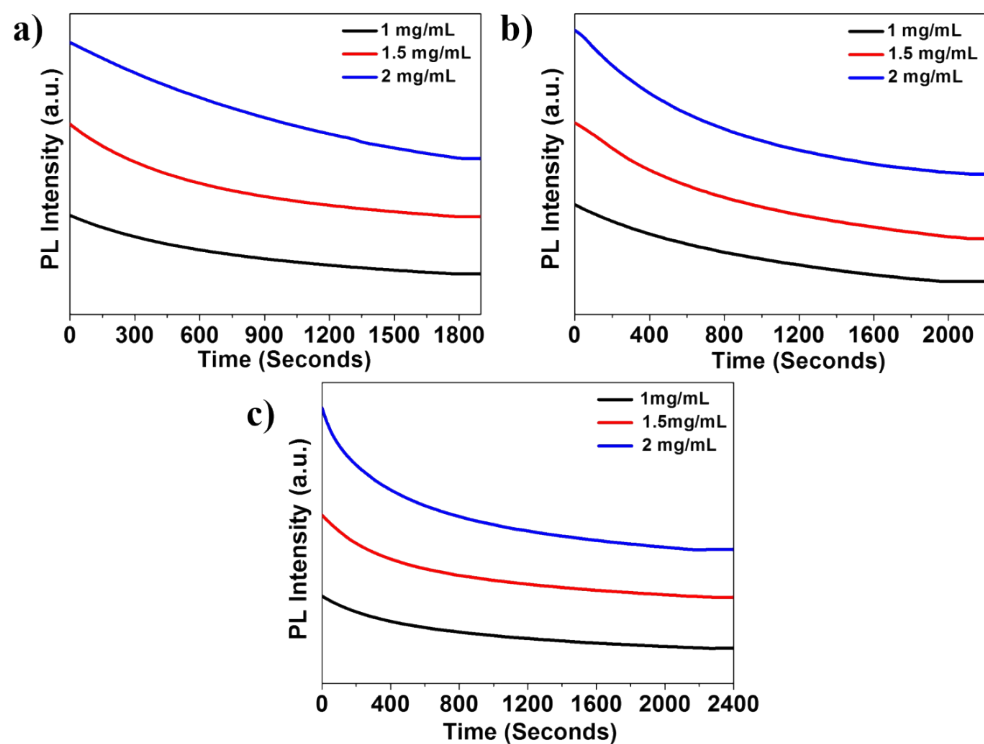

**Fig. S3** Time-dependent fluorescence intensity of BSA-CDs, pepsin-CDs and lipase-CDs with various concentrations in the presence of corresponding sensitive metal ions. a) BSA-CDs with 10  $\mu\text{M}$   $\text{Ag}^+$ ; b) pepsin-CDs with 10  $\mu\text{M}$   $\text{Cu}^{2+}$ ; c) lipase-CDs with 10  $\mu\text{M}$   $\text{Ni}^{2+}$ . (excitation wavelength: 360 nm; emission wavelength: 410 nm)
